# Supplementary material for: Effects of SARS-CoV-2 Omicron BA.1 Spike Mutations on T-Cell Epitopes in Mice
Source: MDPI journal article supplement (doi:10.3390/v15030763), 2023-03-16

# Supplementary Materials

**Figure S1. Arrangement of two-dimensional peptide matrix.** Peptide pools NTD-1~NTD-18 (A), RBD-1~RBD-16 (B), S1-1~S1-12 (C), S2-1~S2-24 (D) in WT Spike, and peptide pools NTD-1~NTD-18 (E), RBD-1~RBD-16 (F), S1-1~S1-12 (G), S2-1~S2-24 (H) in Omicron Spike were shown.

A

|       | NTD-10 | NTD-11 | NTD-12 | NTD-13 | NTD-14 | NTD-15 | NTD-16 | NTD-17 | NTD-18 |
|-------|--------|--------|--------|--------|--------|--------|--------|--------|--------|
| NTD-1 | 1      | 2      | 3      | 4      | 5      | 6      | 7      | 8      | 9      |
| NTD-2 | 10     | 11     | 12     | 13     | 14     | 15     | 16     | 17     | 18     |
| NTD-3 | 19     | 20     | 21     | 22     | 23     | 24     | 25     | 26     | 27     |
| NTD-4 | 28     | 29     | 30     | 31     | 32     | 33     | 34     | 35     | 36     |
| NTD-5 | 37     | 38     | 39     | 40     | 41     | 42     | 43     | 44     | 45     |
| NTD-6 | 46     | 47     | 48     | 49     | 50     | 51     | 52     | 53     | 54     |
| NTD-7 | 55     | 56     | 57     | 58     | 59     | 60     | 61     | 62     | 63     |
| NTD-8 | 64     | 65     | 66     | 67     | 68     | 69     | 70     | 71     | 72     |
| NTD-9 | 73     |        |        |        |        |        |        |        |        |

C

|      | S1-7 | S1-8 | S1-9 | S1-10 | S1-11 | S1-12 |
|------|------|------|------|-------|-------|-------|
| S1-1 | 133  | 134  | 135  | 136   | 137   | 138   |
| S1-2 | 139  | 140  | 141  | 142   | 143   | 144   |
| S1-3 | 145  | 146  | 147  | 148   | 149   | 150   |
| S1-4 | 151  | 152  | 153  | 154   | 155   | 156   |
| S1-5 | 157  | 158  | 159  | 160   | 161   | 162   |
| S1-6 | 163  | 164  | 165  | 166   | 167   | 168   |

E

|       | NTD-10 | NTD-11 | NTD-12 | NTD-13 | NTD-14 | NTD-15 | NTD-16 | NTD-17 | NTD-18 |
|-------|--------|--------|--------|--------|--------|--------|--------|--------|--------|
| NTD-1 | 1      | 2      | 3      | 4      | 5      | 6      | 7      | 8      |        |
| NTD-2 | 9      | 10     | 11     | 12     | 13     | 14     | 15     | 16     |        |
| NTD-3 | 17     | 18     | 19     | 20     | 21     | 22     | 23     | 24     |        |
| NTD-4 | 25     | 26     | 27     | 28     | 29     | 30     | 31     | 32     |        |
| NTD-5 | 33     | 34     | 35     | 36     | 37     | 38     | 39     | 40     |        |
| NTD-6 | 41     | 42     | 43     | 44     | 45     | 46     | 47     | 48     |        |
| NTD-7 | 49     | 50     | 51     | 52     | 53     | 54     | 55     | 56     |        |
| NTD-8 | 57     | 58     | 59     | 60     | 61     | 62     | 63     | 64     |        |
| NTD-9 | 65     | 66     | 67     | 68     | 69     | 70     | 71     | 72     | 73     |

G

|      | S1-7 | S1-8 | S1-9 | S1-10 | S1-11 | S1-12 |
|------|------|------|------|-------|-------|-------|
| S1-1 | 133  | 134  | 135  | 136   | 137   | 138   |
| S1-2 | 139  | 140  | 141  | 142   | 143   | 144   |
| S1-3 | 145  | 146  | 147  | 148   | 149   | 150   |
| S1-4 | 151  | 152  | 153  | 154   | 155   | 156   |
| S1-5 | 157  | 158  | 159  | 160   | 161   | 162   |
| S1-6 | 163  | 164  | 165  | 166   | 167   | 168   |

B

|       | RBD-9 | RBD-10 | RBD-11 | RBD-12 | RBD-13 | RBD-14 | RBD-15 | RBD-16 |
|-------|-------|--------|--------|--------|--------|--------|--------|--------|
| RBD-1 | 74    | 75     | 76     | 77     | 78     | 79     | 80     | 81     |
| RBD-2 | 82    | 83     | 84     | 85     | 86     | 87     | 88     | 89     |
| RBD-3 | 90    | 91     | 92     | 93     | 94     | 95     | 96     | 97     |
| RBD-4 | 98    | 99     | 100    | 101    | 102    | 103    | 104    | 105    |
| RBD-5 | 106   | 107    | 108    | 109    | 110    | 111    | 112    | 113    |
| RBD-6 | 114   | 115    | 116    | 117    | 118    | 119    | 120    | 121    |
| RBD-7 | 122   | 123    | 124    | 125    | 126    | 127    | 128    | 129    |
| RBD-8 | 130   | 131    | 132    |        |        |        |        |        |

D

|       | S2-13 | S2-14 | S2-15 | S2-16 | S2-17 | S2-18 | S2-19 | S2-20 | S2-21 | S2-22 | S2-23 | S2-24 |
|-------|-------|-------|-------|-------|-------|-------|-------|-------|-------|-------|-------|-------|
| S2-1  | 169   | 170   | 171   | 172   | 173   | 174   | 175   | 176   | 177   | 178   | 179   | 180   |
| S2-2  | 181   | 182   | 183   | 184   | 185   | 186   | 187   | 188   | 189   | 190   | 191   | 192   |
| S2-3  | 193   | 194   | 195   | 196   | 197   | 198   | 199   | 200   | 201   | 202   | 203   | 204   |
| S2-4  | 205   | 206   | 207   | 208   | 209   | 210   | 211   | 212   | 213   | 214   | 215   | 216   |
| S2-5  | 217   | 218   | 219   | 220   | 221   | 222   | 223   | 224   | 225   | 226   | 227   | 228   |
| S2-6  | 229   | 230   | 231   | 232   | 233   | 234   | 235   | 236   | 237   | 238   | 239   | 240   |
| S2-7  | 241   | 242   | 243   | 244   | 245   | 246   | 247   | 248   | 249   | 250   | 251   | 252   |
| S2-8  | 253   | 254   | 255   | 256   | 257   | 258   | 259   | 260   | 261   | 262   | 263   | 264   |
| S2-9  | 265   | 266   | 267   | 268   | 269   | 270   | 271   | 272   | 273   | 274   | 275   | 276   |
| S2-10 | 277   | 278   | 279   | 280   | 283   | 284   | 285   | 286   | 287   | 288   | 289   | 290   |
| S2-11 | 291   | 292   | 293   | 294   | 295   | 296   | 297   | 298   | 299   | 300   | 301   | 302   |
| S2-12 | 303   | 304   | 309   | 310   | 311   | 312   | 313   | 314   | 315   | 316   |       |       |

F

|       | RBD-9 | RBD-10 | RBD-11 | RBD-12 | RBD-13 | RBD-14 | RBD-15 | RBD-16 |
|-------|-------|--------|--------|--------|--------|--------|--------|--------|
| RBD-1 | 74    | 75     | 76     | 77     | 78     | 79     | 80     | 81     |
| RBD-2 | 82    | 83     | 84     | 85     | 86     | 87     | 88     | 89     |
| RBD-3 | 90    | 91     | 92     | 93     | 94     | 95     | 96     | 97     |
| RBD-4 | 98    | 99     | 100    | 101    | 102    | 103    | 104    | 105    |
| RBD-5 | 106   | 107    | 108    | 109    | 110    | 111    | 112    | 113    |
| RBD-6 | 114   | 115    | 116    | 117    | 118    | 119    | 120    | 121    |
| RBD-7 | 122   | 123    | 124    | 125    | 126    | 127    | 128    | 129    |
| RBD-8 | 130   | 131    | 132    |        |        |        |        |        |

H

|       | S2-13 | S2-14 | S2-15 | S2-16 | S2-17 | S2-18 | S2-19 | S2-20 | S2-21 | S2-22 | S2-23 | S2-24 |
|-------|-------|-------|-------|-------|-------|-------|-------|-------|-------|-------|-------|-------|
| S2-1  | 169   | 170   | 171   | 172   | 173   | 174   | 175   | 176   | 177   | 178   | 179   | 180   |
| S2-2  | 181   | 182   | 183   | 184   | 185   | 186   | 187   | 188   | 189   | 190   | 191   | 192   |
| S2-3  | 193   | 194   | 195   | 196   | 197   | 198   | 199   | 200   | 201   | 202   | 203   | 204   |
| S2-4  | 205   | 206   | 207   | 208   | 209   | 210   | 211   | 212   | 213   | 214   | 215   | 216   |
| S2-5  | 217   | 218   | 219   | 220   | 221   | 222   | 223   | 224   | 225   | 226   | 227   | 228   |
| S2-6  | 229   | 230   | 231   | 232   | 233   | 234   | 235   | 236   | 237   | 238   | 239   | 240   |
| S2-7  | 241   | 242   | 243   | 244   | 245   | 246   | 247   | 248   | 249   | 250   | 251   | 252   |
| S2-8  | 253   | 254   | 255   | 256   | 257   | 258   | 259   | 260   | 261   | 262   | 263   | 264   |
| S2-9  | 265   | 266   | 267   | 268   | 269   | 270   | 271   | 272   | 273   | 274   | 275   | 276   |
| S2-10 | 277   | 278   | 279   | 280   | 283   | 284   | 285   | 286   | 287   | 288   | 289   | 290   |
| S2-11 | 291   | 292   | 293   | 294   | 295   | 296   | 297   | 298   | 299   | 300   | 301   | 302   |
| S2-12 | 303   | 304   | 309   | 310   | 311   | 312   | 313   | 314   | 315   |       |       |       |

**Figure S2. Mapping of WT Spike specific T cell epitopes in BALB/c mice.** BALB/c mice (n=6 per group) were injected with  $5 \times 10^8$  VP of Ad5-Spike-BA.1. At 2 weeks after vaccination, the splenocytes were prepared, stimulated with peptide pools of WT NTD (A), RBD (B), S1 (C), S2 (D), and the T cell responses were measured by IFN- $\gamma$  ELISpot assay. The two-dimensional peptide matrixes were used (as seen in Figure S1), with SFCs > 50 per  $10^6$  cells was considered as a positive peptide pool, and the candidate peptides were localized within the peptide matrixes. The results were expressed as mean  $\pm$  SEM.

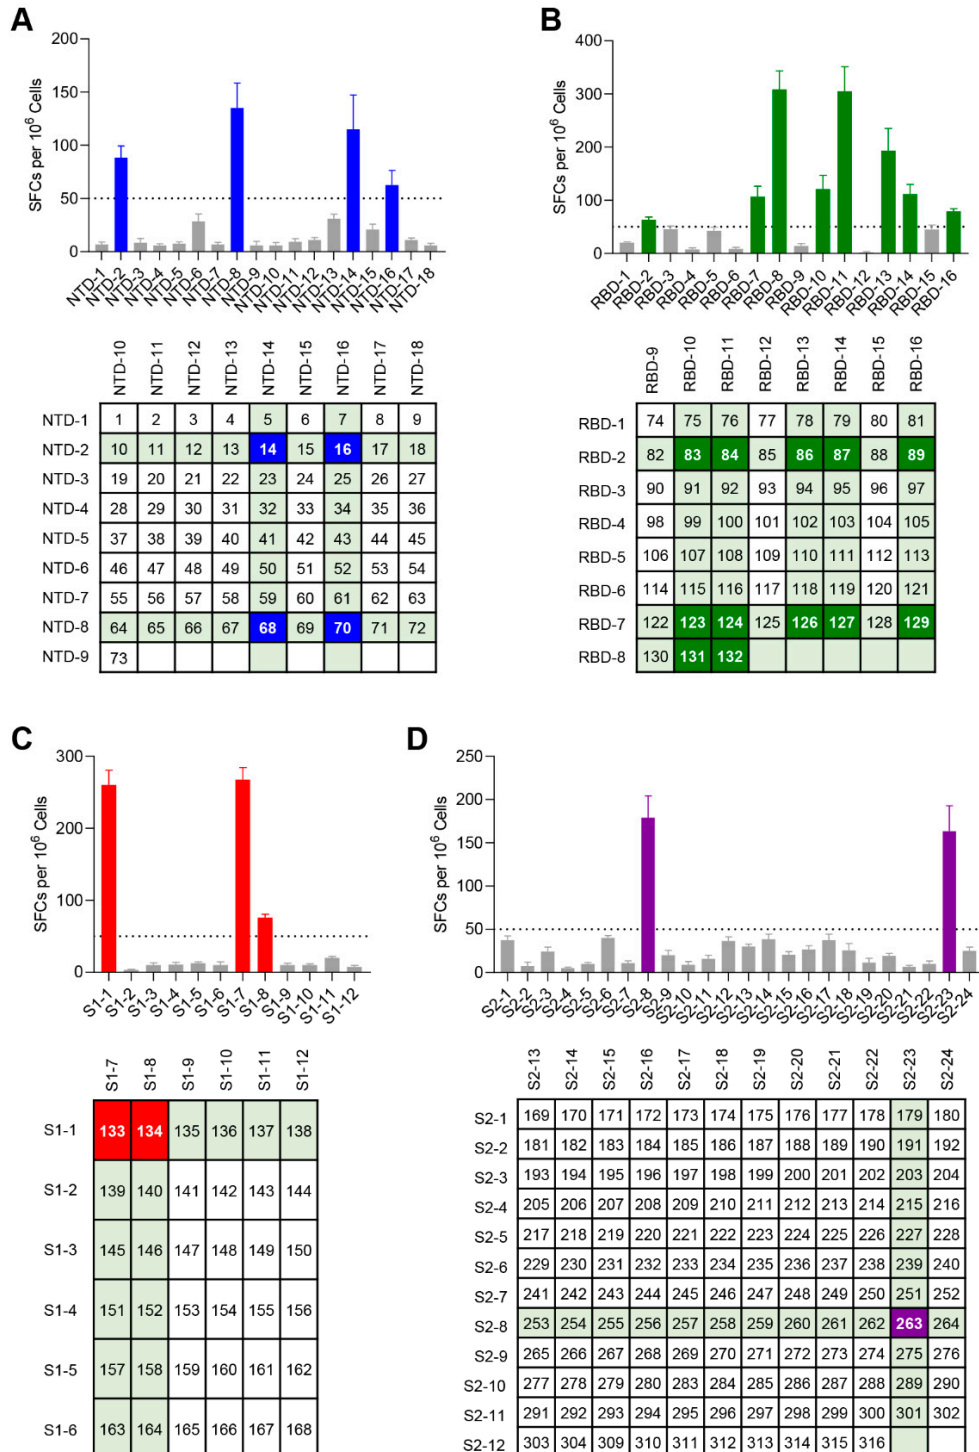

**Figure S3. Mapping of Omicron BA.1 Spike specific T cell epitopes in BALB/c mice.** BALB/c mice (n=6 per group) were injected with  $5 \times 10^8$  VP of Ad5-Spike-BA.1. At 2 weeks after vaccination, the splenocytes were prepared, stimulated with peptide pools of Omicron NTD (A), RBD (B), S1 (C), S2 (D), and the T cell responses were measured by IFN- $\gamma$  ELISpot assay. The two-dimensional peptide matrixes were used (as seen in Figure S1), with SFCs  $> 50$  per  $10^6$  cells was considered as a positive peptide pool, and the candidate peptides were localized within the peptide matrixes. The results were expressed as mean  $\pm$  SEM.

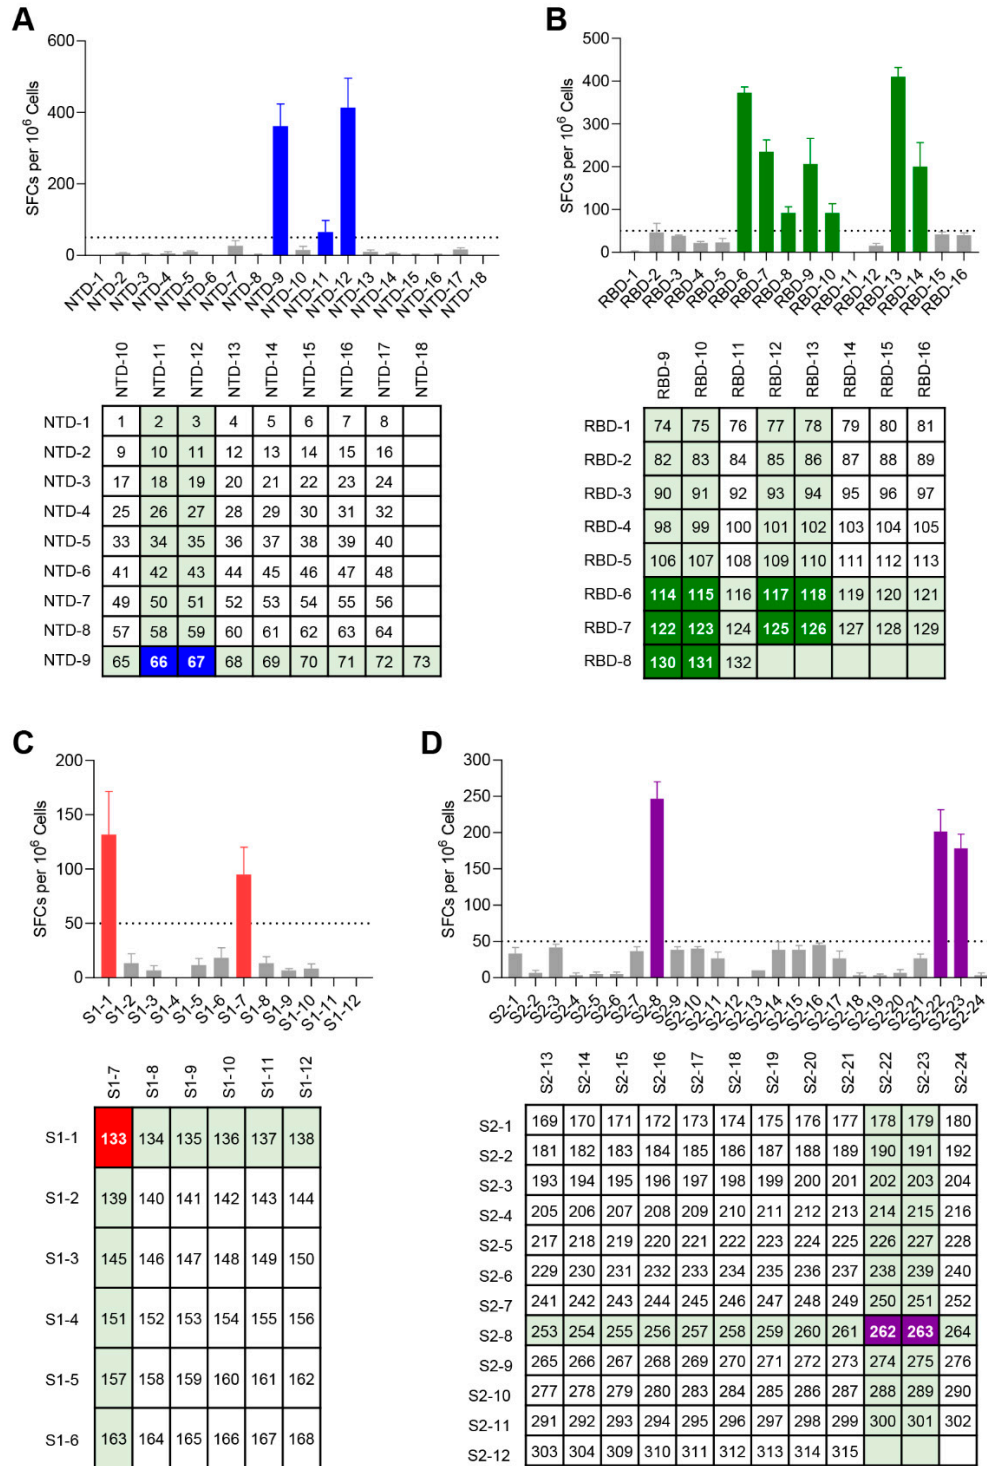

**Figure S4. Mapping of WT Spike specific T cell epitopes in C57BL/6 mice.** C57BL/6 mice (n=6 per group) were injected with  $5 \times 10^8$  VP of Ad5-Spike-BA.1. At 2 weeks after vaccination, the splenocytes were prepared, stimulated with peptide pools of WT NTD (A), RBD (B), S1 (C), S2 (D), and the T cell responses were measured by IFN- $\gamma$  ELISpot assay. The two-dimensional peptide matrixes were used (as seen in Figure S1), with SFCs > 50 per  $10^6$  cells was considered as a positive peptide pool, and the candidate peptides were localized within the peptide matrixes. The results were expressed as mean  $\pm$  SEM.

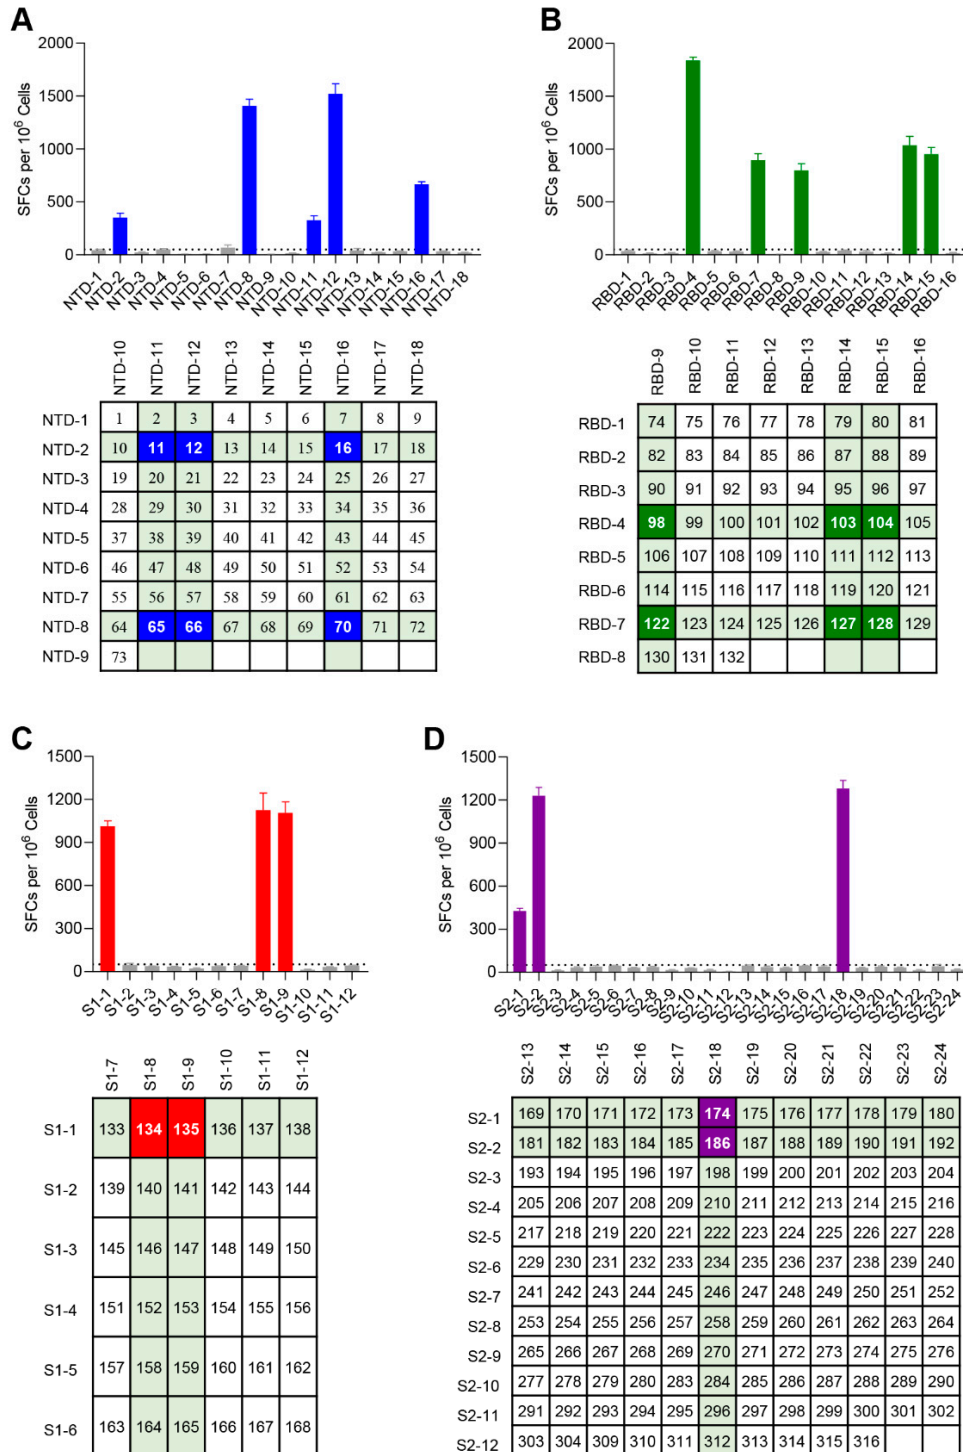

**Figure S5. Mapping of Omicron BA.1 Spike specific T cell epitopes in C57BL/6 mice.** C57BL/6 mice (n=6 per group) were injected with  $5 \times 10^8$  VP of Ad5-Spike-BA.1. At 2 weeks after vaccination, the splenocytes were prepared, stimulated with peptide pools of Omicron NTD (A), RBD (B), S1 (C), S2 (D), and the T cell responses were measured by IFN- $\gamma$  ELISpot assay. The two-dimensional peptide matrixes were used (as seen in Figure S1), with SFCs  $> 50$  per  $10^6$  cells was considered as a positive peptide pool, and the candidate peptides were localized within the peptide matrixes. The results were expressed as mean  $\pm$  SEM.

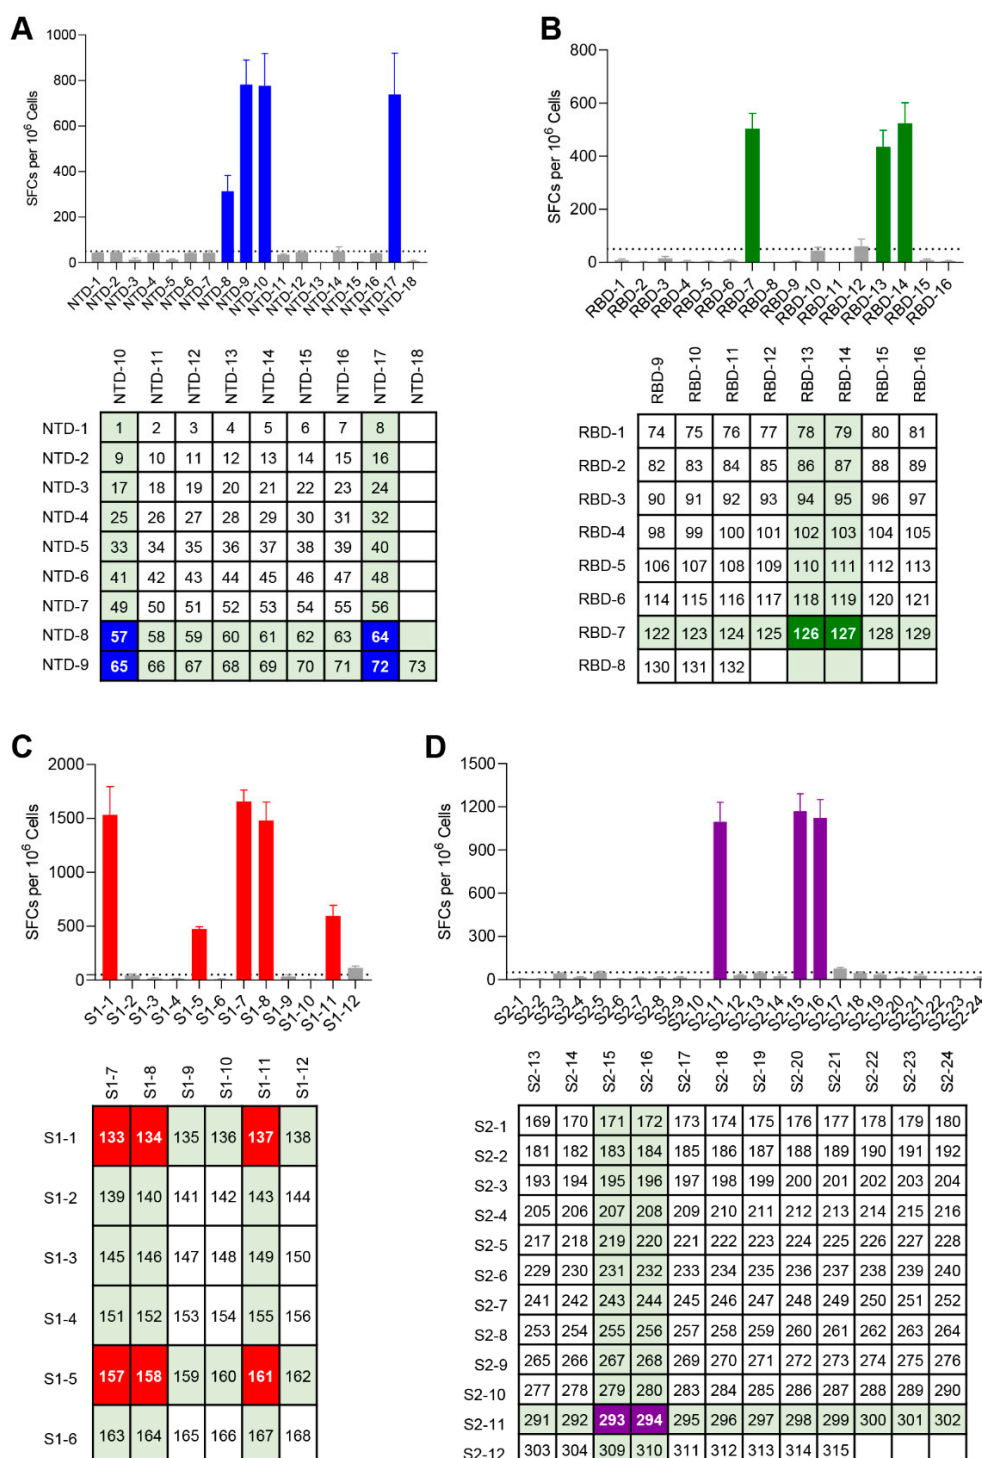



**Figure S6. Representative flow cytometric plots of the responsive peptides identified in BALB/c mice.** To verify either MHCI or MHCII presented the identified peptides, the responsive peptides in the ELISpot assay were further undergone an intracellular cytokine staining assay, the CD8<sup>+</sup> (MHCI) and CD4<sup>+</sup> (MHCII) T cell responses of those peptides were determined. The representative flow cytometric plots of the identified peptides in WT Spike (A) and Omicron Spike (B) were shown.

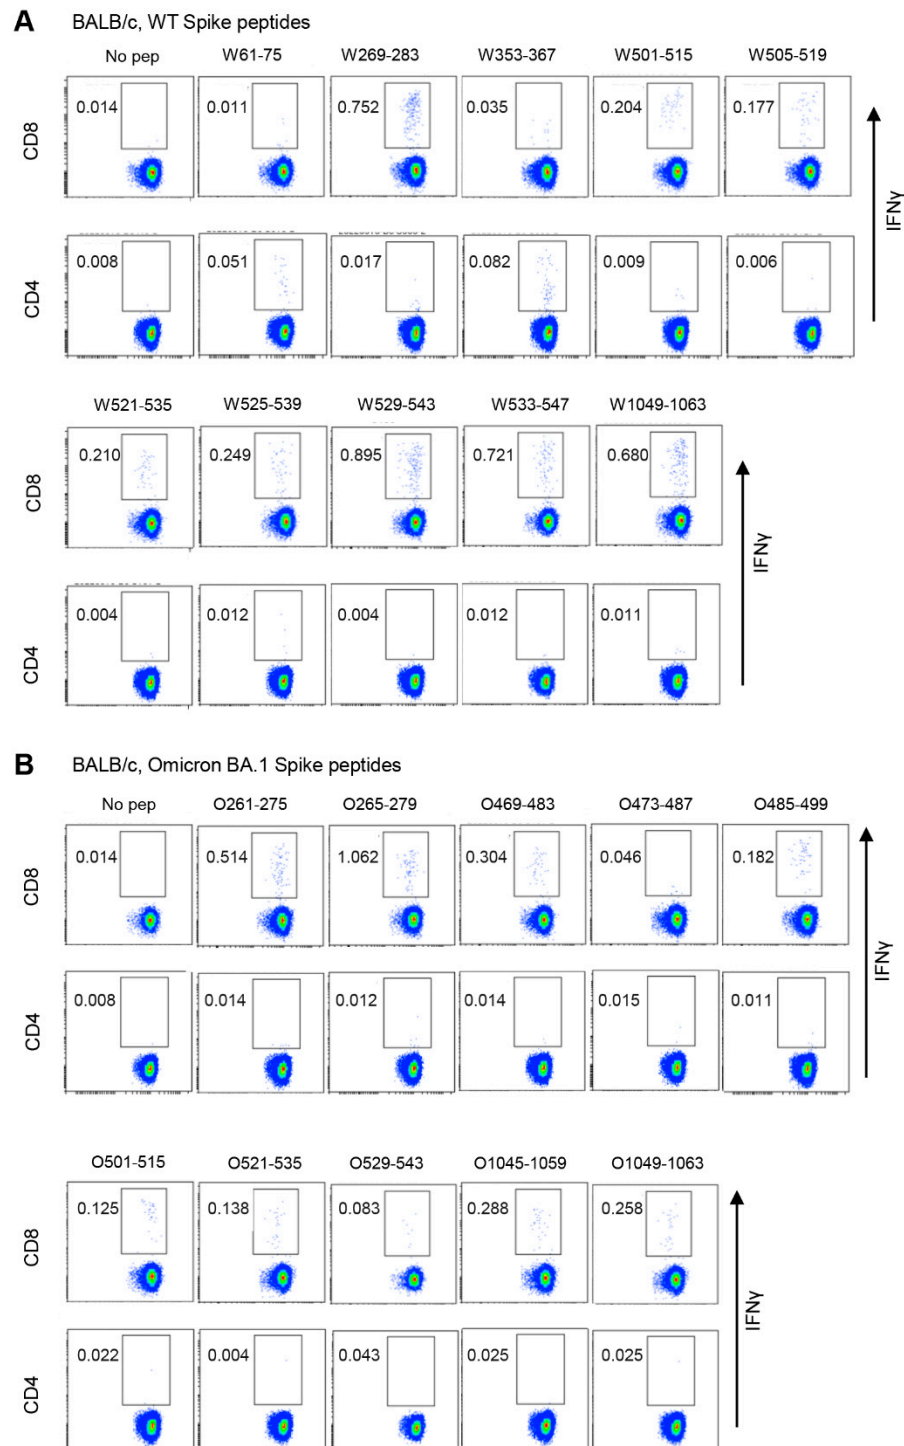

**Figure S7. Representative flow cytometric plots of the responsive peptides identified in C57/BL6 mice.** With the same strategy in Figure S6, the CD8<sup>+</sup> (MHC I) and CD4<sup>+</sup> (MHC II) T cell responses of the identified H-2d specific peptides were determined by an intracellular cytokine staining. The representative flow cytometric plots of the identified peptides in WT Spike (A) and Omicron Spike (B) were shown.

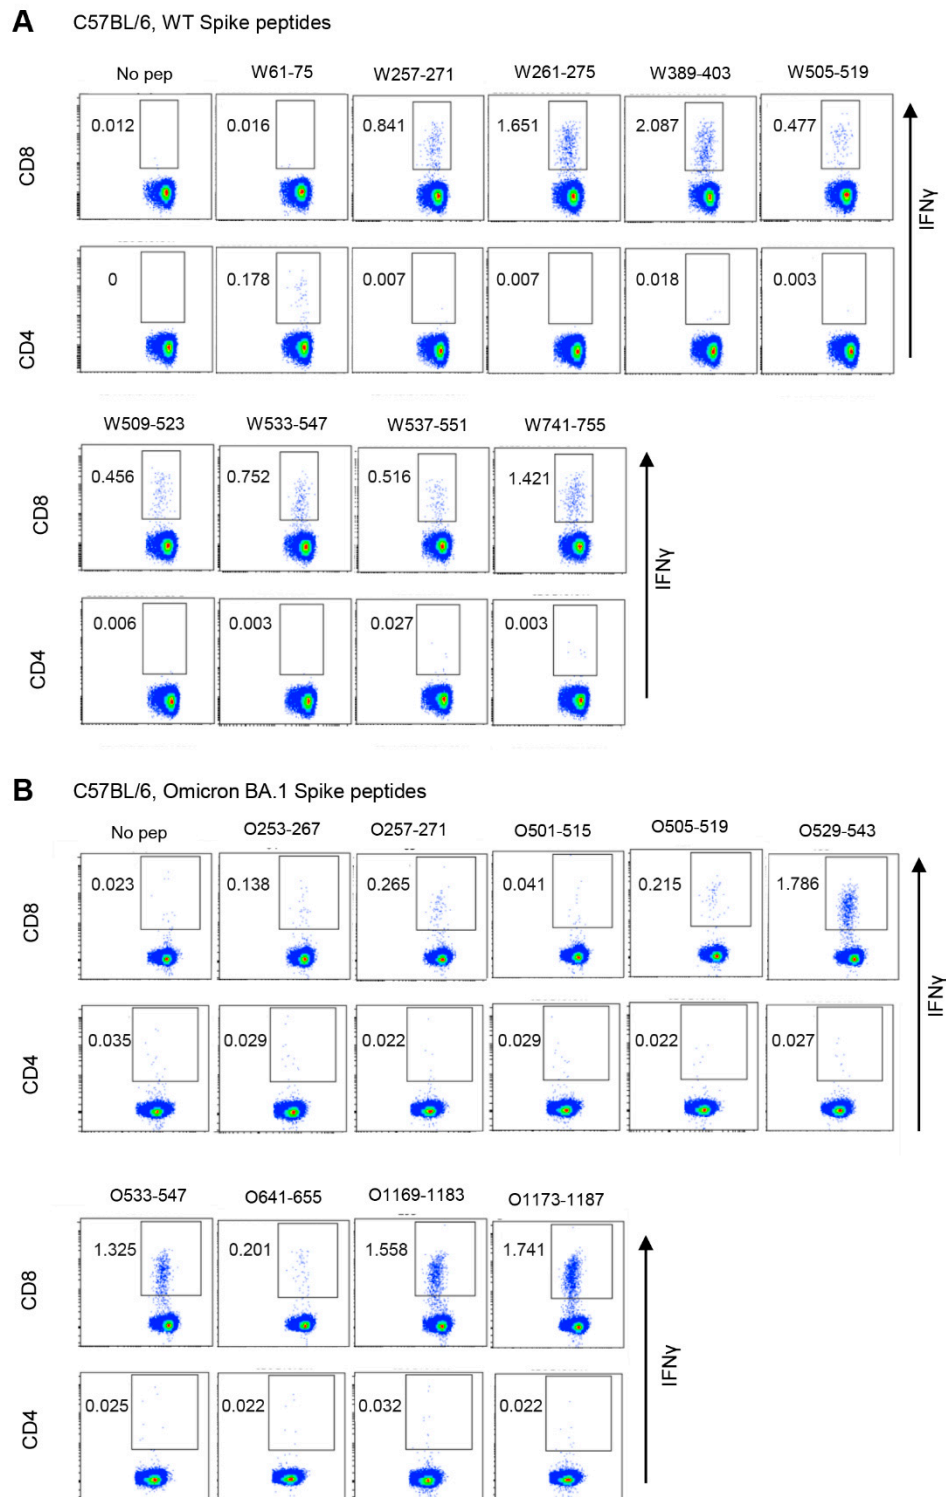

# Figure S8. Identification of the exact CD8<sup>+</sup> T cell epitopes in BALB/c mice.

BALB/c mice (n=3 per group) were vaccinated with Ad5-Spike-BA.1 or Ad5-Spike-BA.1, the splenocytes were prepared at 2 weeks after vaccination and stimulated with the responsive peptides or the corresponding truncated 9-mer peptides in WT Spike (A) and Omicron Spike (B) to assess T cell responses by IFN- $\gamma$  ELISpot. The identified truncated epitopes are labeled with #. All results were expressed as mean  $\pm$  SEM.

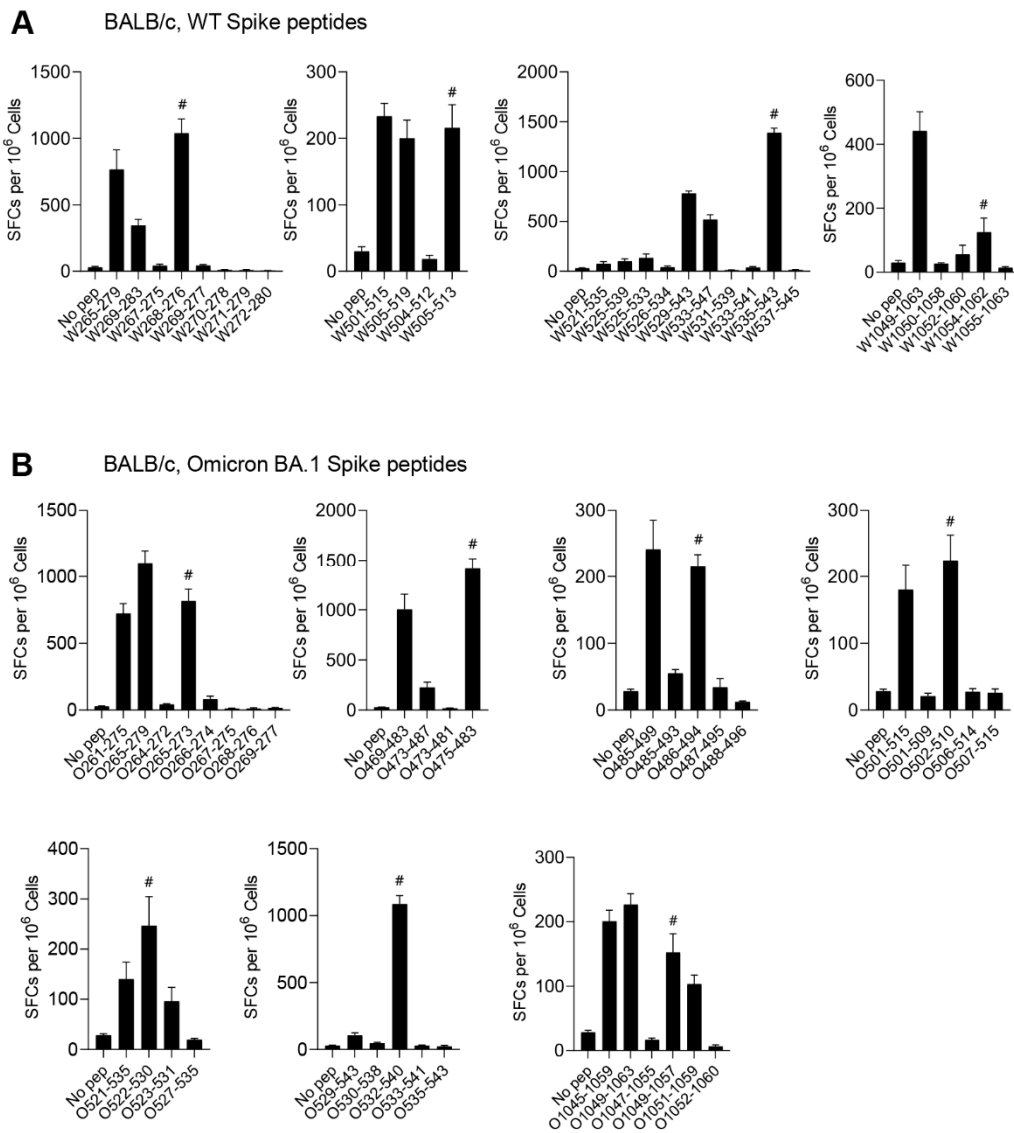



**Figure S9. Identification of the exact CD8<sup>+</sup> T cell epitopes in C57BL/6 mice.** C57BL/6 mice (n=3 per group) were vaccinated with Ad5-Spike-BA.1 or Ad5-Spike-BA.1, the splenocytes were prepared at 2 weeks after vaccination and stimulated with responsive peptides or the corresponding truncated 9-mer peptides in WT Spike (A) and Omicron Spike (B) to assess T cell responses by IFN- $\gamma$  ELISpot. The identified truncated epitopes are labeled with #. All results were expressed as mean  $\pm$  SEM.

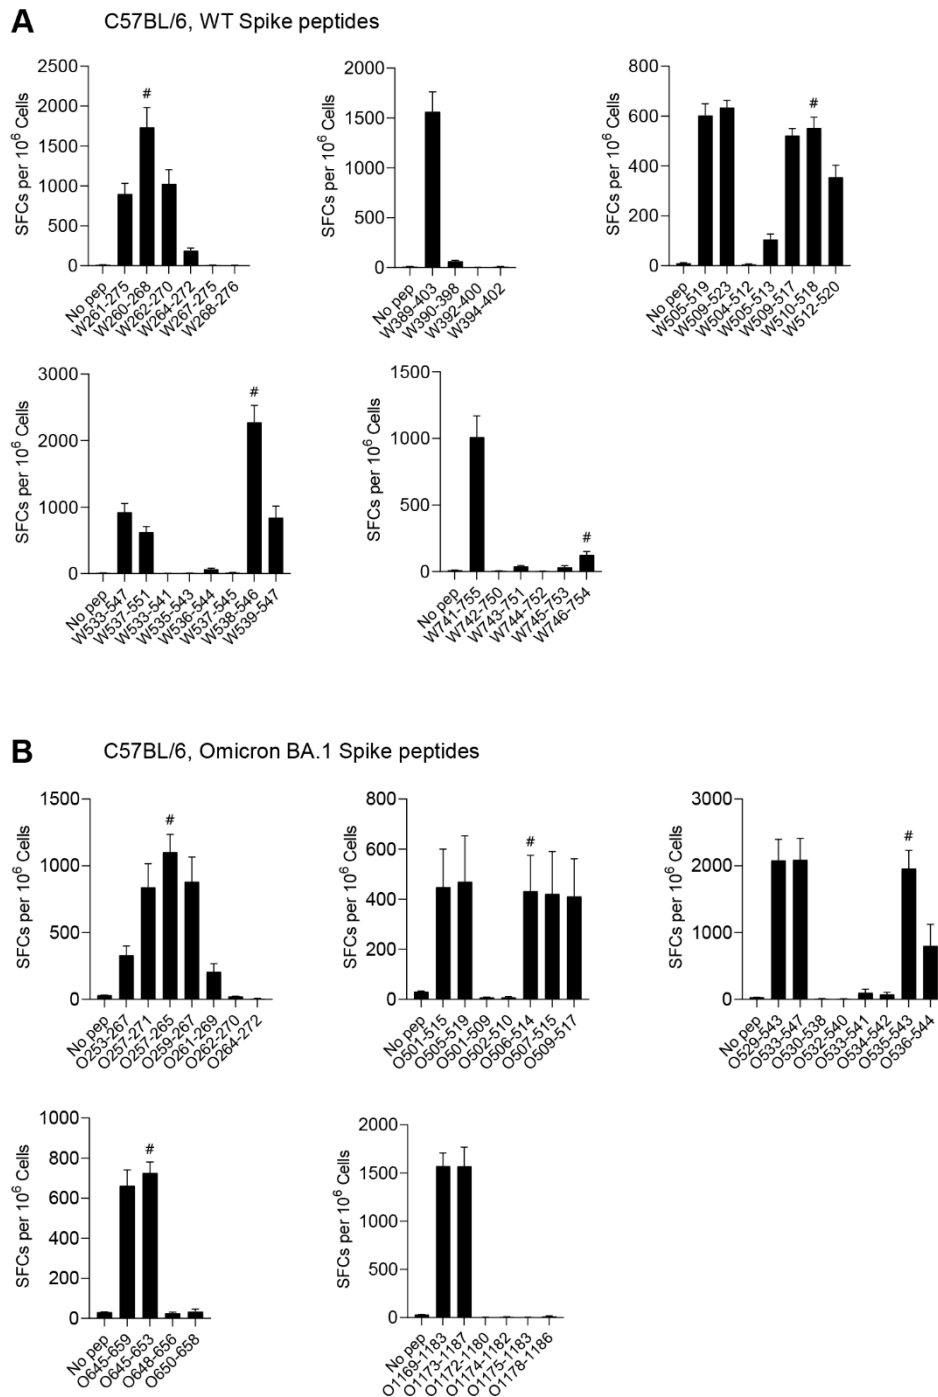

Supplement: s1 [file s1]
